# Supplementary material for: Identification of Factors Associated With Variation in US County-Level Obesity Prevalence Rates Using Epidemiologic vs Machine Learning Models
Source: PubMed Central journal article supplement (PMC6487629; doi:10.1001/jamanetworkopen.2019.2884), 2019-04-26
Supplement: jamanetwopen-2-e192884-s001.pdf [file jamanetwopen-2-e192884-s001.pdf]

## Supplementary Online Content

Scheinker D, Valencia A, Rodriguez F. Identification of factors associated with variation in US county-level obesity prevalence rates using epidemiologic vs machine learning models. *JAMA Netw Open*. 2019;2(4):e192884. doi:10.1001/jamanetworkopen.2019.2884

**eTable 1.** Definition of Variables

**eTable 2.** Data Changes and Exclusions

**eTable 3.** The Machine Learning Models Considered, Their Parameters of, Parameter Values for the Top Performing Setting, and Performance as Measured by  $R^2$  Averaged Over 5-Fold Cross Validation

**eTable 4.** Results of Performance Comparison Between Linear Regression and Gradient Boosting Machine Regression for Selected Variables and All Available Variables Using 30-Fold Cross Validation

**eFigure 1.** The Performance of the GBM Model, as Measured by  $R^2$  Averaged Over 5-Fold Cross Validation, Plotted for a Variety of Parameter Settings

**eFigure 2.** The Performance of the LASSO Model, as Measured by  $R^2$  Averaged Over 5-Fold Cross Validation, Plotted for a Variety of Parameter Settings.

**e Figure 3.** Relative Variable Importance for GBM Over 30 Folds of Cross Validation

This supplementary material has been provided by the authors to give readers additional information about their work.

**eTable 1.** Definition of Variables

| Variables                                | Description                                                                                                                                                                                                                                                                                          | Sources of Data                | Year | Category     |
|------------------------------------------|------------------------------------------------------------------------------------------------------------------------------------------------------------------------------------------------------------------------------------------------------------------------------------------------------|--------------------------------|------|--------------|
| <b>Outcome</b>                           |                                                                                                                                                                                                                                                                                                      |                                |      |              |
| Adult obesity                            | Percentage of adults that report a BMI of 30 or more                                                                                                                                                                                                                                                 | CDC Diabetes Interactive Atlas | 2014 |              |
| <b>Selected Variables</b>                |                                                                                                                                                                                                                                                                                                      |                                |      |              |
| Population                               | Number of persons                                                                                                                                                                                                                                                                                    | Census Population Estimates    | 2016 | Demographics |
| % Rural                                  | Urban areas are defined as having 50,000 or more people. Rural encompasses all population, housing, and territory not included within an urban area.                                                                                                                                                 | Census Population Estimates    | 2010 | Demographics |
| % Females                                | Number of females in county                                                                                                                                                                                                                                                                          | Census Population Estimates    | 2016 | Demographics |
| % below 18 years of age                  | Number of persons less than 18 years old                                                                                                                                                                                                                                                             | Census Population Estimates    | 2016 | Demographics |
| % 65 and older                           | Number of persons at or greater than 65 years old                                                                                                                                                                                                                                                    | Census Population Estimates    | 2016 | Demographics |
| % Non-Hispanic African American          | Persons self-identifying as non-Hispanic African-American                                                                                                                                                                                                                                            | Census Population Estimates    | 2016 | Demographics |
| % Hispanic                               | Persons self-identifying as Hispanic                                                                                                                                                                                                                                                                 | Census Population Estimates    | 2016 | Demographics |
| % Asian                                  | Persons self-identifying as Asian                                                                                                                                                                                                                                                                    | Census Population Estimates    | 2016 | Demographics |
| % American Indian and Alaskan Native     | Persons self-identifying as American Indian/Alaskan Native                                                                                                                                                                                                                                           | Census Population Estimates    | 2016 | Demographics |
| % Native Hawaiian/Other Pacific Islander | Persons self-identifying as Native Hawaiian/Other                                                                                                                                                                                                                                                    | Census Population Estimates    | 2016 | Demographics |
| Region                                   | Census regions are groupings of states and the District of Columbia that subdivide the United States for the presentation of census data. The Census Bureau defines four census regions and identifies each one with a single-digit census code- Northeast (1), Midwest (2), South (3), and West (4) | US Census                      | 2016 | Demographics |

|                                      |                                                                                                                                             |                                                                       |             |               |
|--------------------------------------|---------------------------------------------------------------------------------------------------------------------------------------------|-----------------------------------------------------------------------|-------------|---------------|
| Median household income              | Median Household Income is the income where half of households in a county earn more and half of households earn less.                      | Small Area Income and Poverty Estimates                               | 2016        | Socioeconomic |
| Some college                         | Percentage of adults ages 25-44 with some post-secondary education                                                                          | American Community Survey, 5-year estimates                           | 2012-2016   | Socioeconomic |
| Food Insecurity                      | Food Insecurity is the percentage of the population who did not have access to a reliable source of food during the past year.              | Map the Meal Gap                                                      | 2015        | Socioeconomic |
| Unemployment                         | Percentage of population ages 16 and older unemployed but seeking work                                                                      | Bureau of Labor Statistics                                            | 2016        | Socioeconomic |
| Severe housing problems              | Percentage of households with at least 1 of 4 housing problems: overcrowding, high housing costs, or lack of kitchen or plumbing facilities | Comprehensive Housing Affordability Strategy (CHAS) data              | 2010-2014   | Socioeconomic |
| Uninsured                            | Percentage of population under age 65 without health insurance                                                                              | Small Area Health Insurance Estimates                                 | 2015        | Healthcare    |
| Primary care physicians              | Ratio of population to primary care physicians                                                                                              | Area Health Resource File/American Medical Association                | 2015        | Healthcare    |
| Access to exercise opportunities     | Percentage of population with adequate access to locations for physical activity                                                            | Business Analyst, Delorme map data, ESRI, & US Census Tigerline Files | 2010 & 2016 | Environmental |
| Food environment index               | Index of factors that contribute to a healthy food environment, 0 (worst) to 10 (best)                                                      | USDA Food Environment Atlas, Map the Meal Gap from Feeding America    | 2015        | Environmental |
| <b>Additional Variables</b>          |                                                                                                                                             |                                                                       |             |               |
| Children in single-parent households | Percentage of children that live in a household headed by single parent                                                                     | American Community Survey, 5-year estimates                           | 2012-2016   | Additional    |
| Social associations                  | Number of membership associations per 10,000 population                                                                                     | County Business Patterns                                              | 2015        | Additional    |

|                                       |                                                                                                                                                                                                                 |                                             |           |               |
|---------------------------------------|-----------------------------------------------------------------------------------------------------------------------------------------------------------------------------------------------------------------|---------------------------------------------|-----------|---------------|
| Drinking water violations             | Indicator of the presence of health-related drinking water violations. Yes indicates the presence of a violation, No indicates no violation.                                                                    | Safe Drinking Water Information System      | 2016      | Additional    |
| Driving alone to work                 | Percentage of the workforce that drives alone to work                                                                                                                                                           | American Community Survey, 5-year estimates | 2012-2016 | Additional    |
| Long commute - driving alone          | Among workers who commute in their car alone, the percentage that commute more than 30 minutes                                                                                                                  | American Community Survey, 5-year estimates | 2012-2016 | Additional    |
| Limited access to healthy foods       | Limited Access to Healthy Foods is the percentage of the population that is low income and does not live close to a grocery store.                                                                              | USDA Food Environment Atlas                 | 2015      | Additional    |
| Drug overdose deaths                  | Drug Overdose Deaths are the number of deaths due to drug poisoning per 100,000 population. ICD-10 codes used include X40-X44, X60-X64, X85, and Y10-Y14.                                                       | CDC WONDER mortality data                   | 2014-2016 | Additional    |
| Insufficient sleep                    | Insufficient Sleep is the percentage of adults who responded to the following question by stating they sleep less than 7 hours per night: "On average, how many hours of sleep do you get in a 24-hour period?" | Behavioral Risk Factor Surveillance System  | 2016      | Additional    |
| Health care costs                     | Health Care Costs are the price-adjusted Medicare reimbursements (Parts A and B) per enrollee                                                                                                                   | Dartmouth Atlas of Health Care              | 2015      | Additional    |
| 80 <sup>th</sup> Percentile Income    | Households with income at 80 <sup>th</sup> percentile                                                                                                                                                           | Small Area Income and Poverty Estimates     | 2016      | Socioeconomic |
| 20 <sup>th</sup> Percentile Income    | Households with income at 20 <sup>th</sup> percentile                                                                                                                                                           | Small Area Income and Poverty Estimates     | 2016      | Socioeconomic |
| <b>Excluded Variables</b>             |                                                                                                                                                                                                                 |                                             |           |               |
| Income inequality                     | Ratio of household income at the 80th percentile to income at the 20th percentile                                                                                                                               | American Community Survey, 5-year estimates | 2012-2016 | Excluded*     |
| Residential segregation - black/white | Racial/ethnic residential segregation refers to the degree to which two or more groups live separately from one another in a geographic area.                                                                   | American Community Survey, 5-year estimates | 2012-2016 | Excluded*     |

|                                           |                                                                                                                                                                                                                                                                                 |                                                                 |           |            |
|-------------------------------------------|---------------------------------------------------------------------------------------------------------------------------------------------------------------------------------------------------------------------------------------------------------------------------------|-----------------------------------------------------------------|-----------|------------|
| Residential segregation - non-white/white | Racial/ethnic residential segregation refers to the degree to which two or more groups live separately from one another in a geographic area.                                                                                                                                   | American Community Survey, 5-year estimates                     | 2012-2016 | Excluded*  |
| % not proficient in English               | Number of respondents using another language at home other than English                                                                                                                                                                                                         | American Community Survey, 5-year estimates                     | 2012-2016 | Excluded*  |
| Dentists                                  | Ratio of population to dentists                                                                                                                                                                                                                                                 | Area Health Resource File/National Provider Identification file | 2016      | Excluded*  |
| Poor or fair health                       | Percentage of adults reporting fair or poor health (age-adjusted)                                                                                                                                                                                                               | Behavioral Risk Factor Surveillance System                      | 2016      | Excluded** |
| Poor physical health days                 | Average number of physically unhealthy days reported in past 30 days (age-adjusted)                                                                                                                                                                                             | Behavioral Risk Factor Surveillance System                      | 2016      | Excluded** |
| Poor mental health days                   | Average number of mentally unhealthy days reported in past 30 days (age-adjusted)                                                                                                                                                                                               | Behavioral Risk Factor Surveillance System                      | 2016      | Excluded** |
| Diabetes                                  | Diabetes prevalence is the prevalence of diagnosed diabetes in a given county.                                                                                                                                                                                                  | Behavioral Risk Factor Surveillance System                      | 2014      | Excluded** |
| Adult smoking                             | Percentage of adults who are current smokers                                                                                                                                                                                                                                    | Behavioral Risk Factor Surveillance System                      | 2016      | Excluded** |
| Excessive drinking                        | Percentage of adults reporting binge or heavy drinking                                                                                                                                                                                                                          | Behavioral Risk Factor Surveillance System                      | 2016      | Excluded** |
| Frequent physical distress                | Frequent Physical Distress is the percentage of adults who reported $\geq 14$ days in response to the question, "Thinking about your physical health, which includes physical illness and injury, for how many days during the past 30 days was your physical health not good?" | Behavioral Risk Factor Surveillance System                      | 2016      | Excluded** |
| Frequent mental distress                  | Frequent Mental Distress is the percentage of adults who reported $\geq 14$ days in response to the question, "Now, thinking about your mental health, which includes stress, depression,                                                                                       | Behavioral Risk Factor Surveillance System                      | 2016      | Excluded** |

|                              |                                                                                                                                                             |                                       |           |              |
|------------------------------|-------------------------------------------------------------------------------------------------------------------------------------------------------------|---------------------------------------|-----------|--------------|
|                              | and problems with emotions, for how many days during the past 30 days was your mental health not good?"                                                     |                                       |           |              |
| Physical inactivity          | Percentage of adults age 20 and over reporting no leisure-time physical activity                                                                            | CDC Diabetes Interactive Atlas        | 2014      | Excluded**   |
| Injury deaths                | Number of deaths due to injury per 100,000 population                                                                                                       | CDC WONDER mortality data             | 2012-2016 | Excluded*    |
| Child mortality              | Child Mortality is the number of deaths among children under age 18 per 100,000 population.                                                                 | CDC WONDER mortality data             | 2013-2016 | Excluded*    |
| Infant mortality             | Infant Mortality measures the number of deaths among children less than one year of age per 1,000 live births.                                              | CDC WONDER mortality data             | 2010-2016 | Excluded*    |
| Motor vehicle crash deaths   | Motor Vehicle Crash Deaths are the number of deaths due to traffic accidents involving a motor vehicle per 100,000 population.                              | CDC WONDER mortality data             | 2010-2016 | Excluded*    |
| Homicides                    | Homicides are the number of deaths from assaults, defined as ICD-10 codes X85-Y09, per 100,000 population.                                                  | CDC WONDER mortality data             | 2010-2016 | Excluded*    |
| Firearm fatalities           | Firearm Fatalities are the number of deaths due to firearms, defined as ICD-10 codes W32-W34, X72-X74, X93-X95, Y22-Y24, and Y35.0, per 100,000 population. | CDC WONDER mortality data             | 2012-2016 | Excluded*    |
| % Non-Hispanic white         | Persons self-identifying as non-Hispanic white                                                                                                              | Census Population Estimates           | 2016      | Demographics |
| Mental health providers      | Ratio of population to mental health providers                                                                                                              | CMS, National Provider Identification | 2017      | Excluded*    |
| Other primary care providers | Other Primary Care Providers is the ratio of the county population to the number of other primary care providers                                            | CMS, National Provider Identification | 2017      | Excluded*    |
| Preventable hospital stays   | Number of hospital stays for ambulatory-care sensitive conditions per 1,000 Medicare enrollees                                                              | Dartmouth Atlas of Health Care        | 2015      | Excluded*    |
| Diabetes monitoring          | Percentage of diabetic Medicare enrollees ages 65-75 that receive HbA1c monitoring                                                                          | Dartmouth Atlas of Health Care        | 2014      | Excluded*    |
| Mammography screening        | Percentage of female Medicare enrollees ages 67-69 that receive mammography screening                                                                       | Dartmouth Atlas of Health Care        | 2014      | Excluded*    |
| High school graduation       | Percentage of ninth-grade cohort that graduates in four years                                                                                               | EDFacts                               | 2014-2015 | Excluded*    |

|                                                   |                                                                                                                                                                                                                                                                                       |                                                                       |           |           |
|---------------------------------------------------|---------------------------------------------------------------------------------------------------------------------------------------------------------------------------------------------------------------------------------------------------------------------------------------|-----------------------------------------------------------------------|-----------|-----------|
| Air pollution - particulate matter <sup>1</sup>   | Average daily density of fine particulate matter in micrograms per cubic meter (PM2.5)                                                                                                                                                                                                | Environmental Public Health Tracking Network                          | 2012      | Excluded* |
| Alcohol-impaired driving deaths                   | Percentage of driving deaths with alcohol involvement                                                                                                                                                                                                                                 | Fatality Analysis Reporting System                                    | 2012-2016 | Excluded* |
| Disconnected youth                                | Disconnected Youth is the percentage of teens and young adults ages 16-24 who are neither working nor in school.                                                                                                                                                                      | Measure of America                                                    | 2010-2014 | Excluded* |
| Children eligible for free or reduced price lunch | Children Eligible for Free or Reduced Price Lunch is the percentage of children enrolled in public schools, grades PK - 12, eligible for free (family income less than 130% of federal poverty level) or reduced price (family income less than 185% of federal poverty level) lunch. | National Center for Education Statistics                              | 2015-2016 | Excluded* |
| Drug overdose deaths - modeled                    | Drug Overdose Deaths are a modeled estimate of the number of deaths due to drug poisoning per 100,000 population. ICD-10 codes used include X40-X44, X60-X64, X85, and Y10-Y14.                                                                                                       | National Center for Health Statistics - Data.CDC.gov                  | 2016      | Excluded* |
| Premature death                                   | Years of potential life lost before age 75 per 100,000 population (age-adjusted)                                                                                                                                                                                                      | National Center for Health Statistics - Mortality Files               | 2014-2016 | Excluded* |
| Low birthweight                                   | Percentage of live births with low birthweight (< 2500 grams)                                                                                                                                                                                                                         | National Center for Health Statistics - Natality files                | 2010-2016 | Excluded* |
| Teen births                                       | Number of births per 1,000 female population ages 15-19                                                                                                                                                                                                                               | National Center for Health Statistics - Natality files                | 2010-2016 | Excluded* |
| HIV Prevalence                                    | HIV prevalence measures the number of diagnosed cases of HIV for persons aged 13 years and older in a county per 100,000 population                                                                                                                                                   | National Center for HIV/AIDS, Viral Hepatitis, STD, and TB Prevention | 2015      | Excluded* |
| Sexually transmitted infections                   | Number of newly diagnosed chlamydia cases per 100,000 population                                                                                                                                                                                                                      | National Center for HIV/AIDS, Viral Hepatitis, STD, and TB Prevention | 2015      | Excluded* |
| Uninsured adults                                  | Uninsured Adults is the percentage of the population ages 18 to 64 that has no health insurance coverage in a given county.                                                                                                                                                           | Small Area Health Insurance Estimates                                 | 2015      | Excluded* |

|                     |                                                                                                            |                                         |           |            |
|---------------------|------------------------------------------------------------------------------------------------------------|-----------------------------------------|-----------|------------|
| Uninsured children  | Uninsured Children is the percentage of the population under age 19 that has no health insurance coverage. | Small Area Health Insurance Estimates   | 2015      | Excluded*  |
| Children in poverty | Percentage of children under age 18 in poverty                                                             | Small Area Income and Poverty Estimates | 2016      | Additional |
| Violent crime       | Number of reported violent crime offenses per 100,000 population                                           | Uniform Crime Reporting - FBI           | 2012-2014 | Excluded*  |

\*Excluded due to more than 200 missing values \*\*Excluded to avoid inclusion of coefficients uninterpretable due to endogeneity



**eTable 2.** Data Changes and Exclusions

| Variables   | Explanation for exclusion/change                                                                                                                                                                                                                                                                             |
|-------------|--------------------------------------------------------------------------------------------------------------------------------------------------------------------------------------------------------------------------------------------------------------------------------------------------------------|
| County Name | Kusilvak and Wade Hampton counties in Alaska are the same, but both were listed in the CHR dataset, so Kusilvak was omitted.<br><br>Skagway and Hoonah-Angoon counties in Alaska were combined, and Petersburg, Wrangell, and Prince of Wales-Hyder, and Ketchikan Gateway counties in Alaska were combined. |

Include details of county name changes, counties with missing data, data exclusions, and data normalization.

**eTable 3.** The Machine Learning Models Considered, Their Parameters of, Parameter Values for the Top Performing Setting, and Performance as Measured by  $R^2$  Averaged Over 5-Fold Cross Validation

| Model                                                                                         | Function & Package | Tuning parameters                                             | Parameter values considered      | Parameter value for top performing model | $R^2$ of top performing model |
|-----------------------------------------------------------------------------------------------|--------------------|---------------------------------------------------------------|----------------------------------|------------------------------------------|-------------------------------|
| Regression Trees                                                                              | Rpart, rpart       | Complexity parameter                                          | 0.002, 0.004, 0.006, 0.008, 0.01 | 0.0004                                   | 0.43                          |
| <b>Gradient boosting machine</b>                                                              | Gbm, gbm           | Interaction depth                                             | 10, 12, 14 ...20                 | 20                                       | <b>0.65</b>                   |
|                                                                                               |                    | Number of trees                                               | 150, 160, 170 ...250             | 180                                      |                               |
|                                                                                               |                    | Shrinkage                                                     | 0.01, 0.02, ...0.05              | 0.05                                     |                               |
|                                                                                               |                    | Minimum observations in node                                  | 2, 4, 6 ...10                    | 8                                        |                               |
| Random forests                                                                                | Rf, randomForest   | Number of variables available for splitting at each tree node | 1, 2, 3, ...15                   | 6                                        | 0.61                          |
| LASSO <sup>+</sup>                                                                            | Lasso, elasticnet  | Lambda – regularization parameter                             | 0.01, 0.02, ...0.1               | 0.04                                     | 0.61                          |
|                                                                                               |                    | Alpha                                                         | 0.5, 1, 1.5, 2                   | 0.5                                      |                               |
| LASSO with all second order variable interactions*                                            | Lasso, elasticnet  | Lambda – regularization parameter                             | 0.01, 0.02, ...0.1               | 0.03                                     | 0.64                          |
|                                                                                               |                    | Alpha                                                         | 0.5, 1, 1.5, 2                   | 1                                        |                               |
| Akaike/Bayesian Information Criteria with all second order variable interactions <sup>#</sup> | step               | k – complexity parameter                                      | 2, 4, ln(800), 8 <sup>!</sup>    | ln(800)                                  | 0.57                          |

<sup>†</sup>Regression with variables selected with LASSO. <sup>\*</sup>Regression with variables selected with LASSO from all possible second order interactions of the variables. <sup>#</sup>Regression with variables selected with backwards stepwise selection starting from a full model including all second order interactions, the settings corresponding to AIC and BIC are, respectively,  $k=2$  and  $k=\log(n)$  where  $\log$  is the natural logarithm and  $n$  is the number of entries in the training set (e.g.,  $\log(800) = 6.68$ )

**eTable 4.** Results of Performance Comparison Between Linear Regression and Gradient Boosting Machine Regression for Selected Variables and all Available Variables Using 30-Fold Cross Validation

|                                            | <b>Selected Variables</b>      | <b>All Variables</b>        | <b>Model Difference</b> |
|--------------------------------------------|--------------------------------|-----------------------------|-------------------------|
| Models                                     | Average testing R <sup>2</sup> | Mean testing R <sup>2</sup> |                         |
| Linear Regression                          | 0.58                           | 0.60                        | 0.02 (p = 0.003)        |
| Gradient Boosting Machine (GBM) Regression | 0.66                           | 0.68                        | 0.02 (p = 0.140)        |
| Model Differences                          | 0.08 (p-value < 0.001)         | 0.08 (p-value < 0.001)      |                         |

**eFigure 1.** The Performance of the GBM Model, as Measured by  $R^2$  Averaged Over 5-Fold Cross Validation, Plotted for a Variety of Parameter Settings

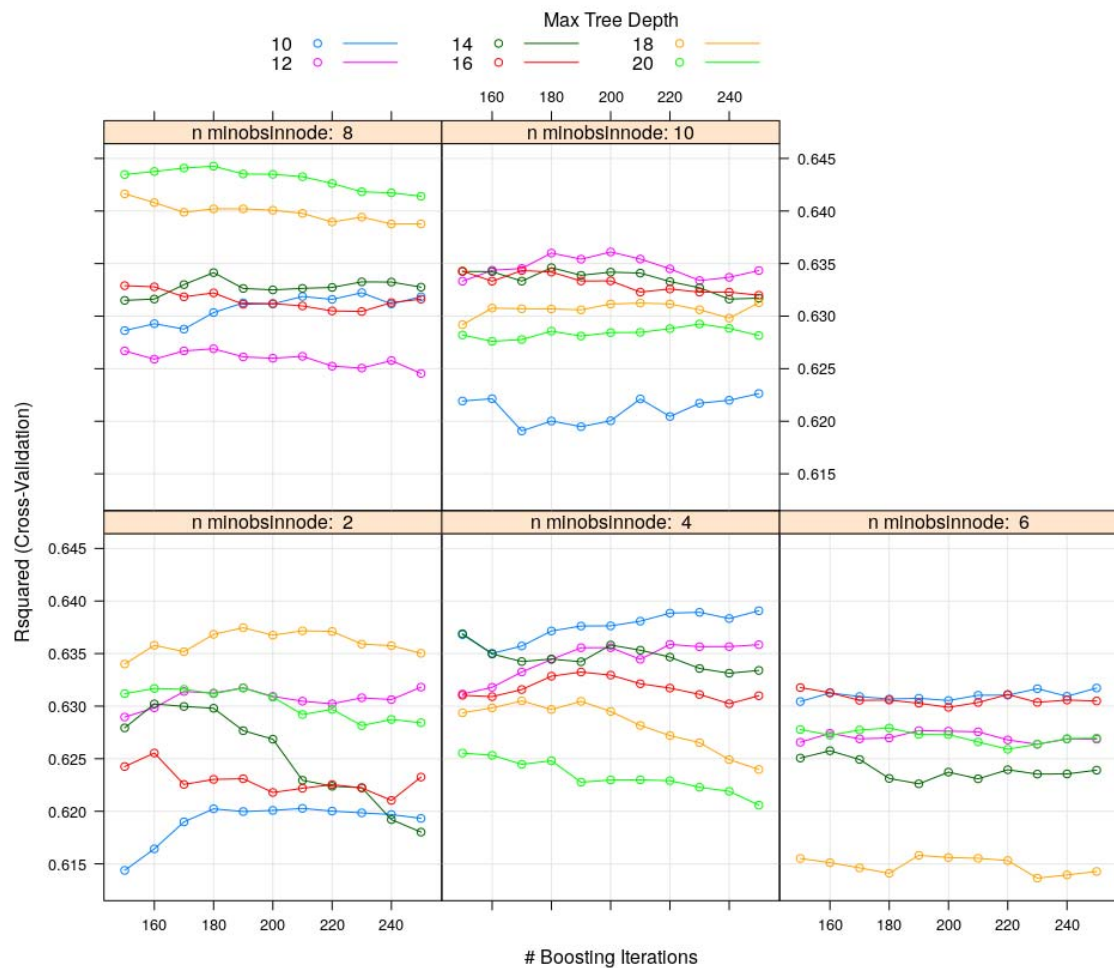

Each plot corresponds to a distinct setting of the parameter Minimum Observations in Node. Each plot shows the mean  $R^2$  calculated with 5-fold cross validation (y-axis) as a function of the settings of the parameter Number of Boosting Iterations. Each line in each plot corresponds to a distinct setting of the parameter Maximum Tree Depth.

**eFigure 2.** The Performance of the LASSO Model, as Measured by  $R^2$  Averaged Over 5-Fold Cross Validation, Plotted for a Variety of Parameter Settings. Overlapping Lines Not Visible

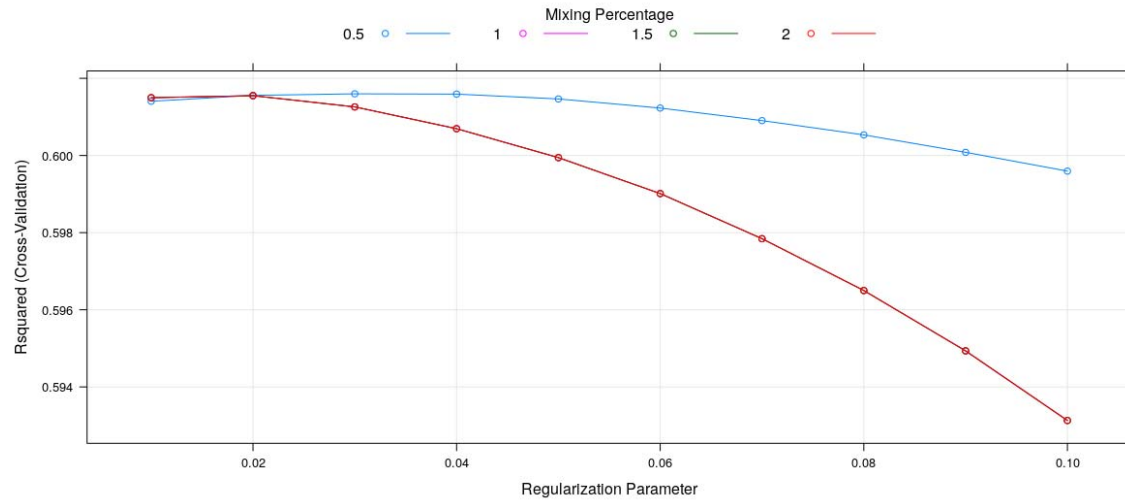

The mean  $R^2$  calculated with 5-fold cross validation (y-axis) is shown as a function of the distinct values of the Regularization Parameter  $\lambda$ . Each line in each plot corresponds to a distinct setting of the mixing parameter  $\alpha$  ( $\alpha = 1$  corresponds to LASSO). Values of  $\alpha$  that resulted in equivalent models result in overlapping lines not visible in the plot.

**Figure 3.** Relative Variable Importance for GBM Over 30 Folds of Cross Validation

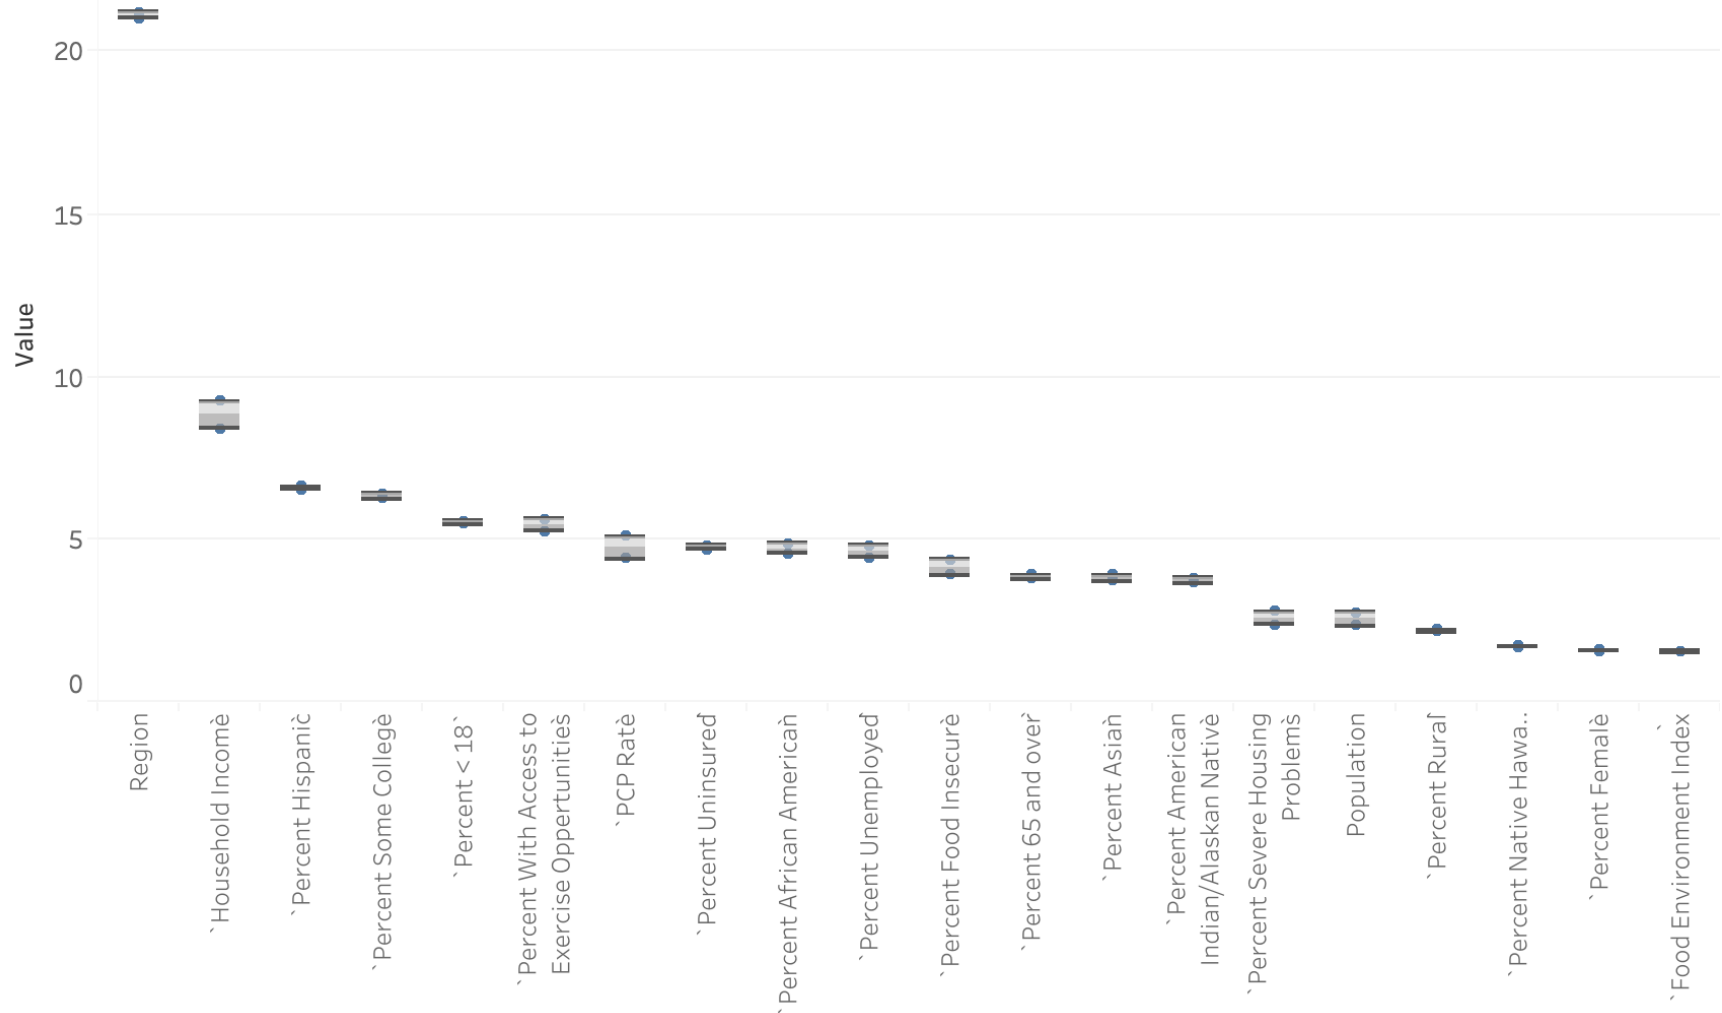

The relative importance of each variable in the GBM model in each of 30-folds of cross validation is shown. The x-axis is labeled with the variables used in the GBM model. The y-axis shows the relative importance of each variable.
